# Supplementary material
Source: PubMed Central journal article supplement (PMC4791821)
Supplement: CJN.08210815_CJN08210815SupplementaryData.pdf [file CJN.08210815_CJN08210815SupplementaryData.pdf]

Supplemental Table I. Unadjusted and adjusted risk of post-discharge mortality stratified by eGFR and BUN at discharge

| Endpoint               | Group                                                       | No. of Patients | No. of patients with events (%) | Unadjusted HR | (95% CI)      | P value | Adjusted HR | (95% CI)      | P value |
|------------------------|-------------------------------------------------------------|-----------------|---------------------------------|---------------|---------------|---------|-------------|---------------|---------|
| <b>All-cause death</b> | <b>eGFR <math>\geq</math>30 and BUN &lt;25</b>              | 2424            | 314 (13.0)                      | 1.00          |               |         | 1.00        |               |         |
|                        | <b>eGFR <math>\geq</math>30 and BUN <math>\geq</math>25</b> | 1059            | 255 (24.1)                      | 2.06          | (1.74 - 2.43) | <0.001  | 1.40        | (1.18 - 1.67) | <0.001  |
|                        | <b>eGFR &lt;30 and BUN &lt;25</b>                           | 126             | 23 (18.3)                       | 1.60          | (1.05 - 2.45) | 0.03    | 1.26        | (0.86 - 2.10) | 0.19    |
|                        | <b>eGFR &lt;30 and BUN <math>\geq</math>25</b>              | 840             | 259 (30.8)                      | 2.88          | (2.44 - 3.40) | <0.001  | 1.80        | (1.50 - 2.16) | <0.001  |
| <b>Cardiac death</b>   | <b>eGFR <math>\geq</math>30 and BUN &lt;25</b>              | 2424            | 163 (6.7)                       | 1.00          |               |         | 1.00        |               |         |
|                        | <b>eGFR <math>\geq</math>30 and BUN <math>\geq</math>25</b> | 1059            | 144 (13.6)                      | 2.22          | (1.77 - 2.78) | <0.001  | 1.56        | (1.23 - 1.97) | <0.001  |
|                        | <b>eGFR &lt;30 and BUN &lt;25</b>                           | 126             | 9 (7.1)                         | 1.18          | (0.60 - 2.31) | 0.63    | 0.95        | (0.44 - 2.04) | 0.90    |
|                        | <b>eGFR &lt;30 and BUN <math>\geq</math>25</b>              | 840             | 148 (17.6)                      | 3.14          | (2.51 - 3.92) | <0.001  | 2.09        | (1.64 - 2.68) | <0.001  |

eGFR = estimated glomerular filtration rate, BUN = blood urea nitrogen, HR = hazard ratio, CI = confidence interval.

**Supplemental Table II. Unadjusted and adjusted risk of post-discharge mortality stratified by eGFR using the simplified MDRD-4 formula and BUN at discharge**

| Endpoint               | Group                                                       | No. of Patients | No. of patients with events (%) | Unadjusted HR | (95% CI)      | P value | Adjusted HR | (95% CI)      | P value |
|------------------------|-------------------------------------------------------------|-----------------|---------------------------------|---------------|---------------|---------|-------------|---------------|---------|
| <b>All-cause death</b> | <b>eGFR <math>\geq</math>45 and BUN &lt;25</b>              | 2368            | 306 (12.9)                      | 1.00          |               |         | 1.00        |               |         |
|                        | <b>eGFR <math>\geq</math>45 and BUN <math>\geq</math>25</b> | 908             | 211 (23.2)                      | 1.98          | (1.66 - 2.36) | <0.001  | 1.37        | (1.14 - 1.65) | <0.001  |
|                        | <b>eGFR &lt;45 and BUN &lt;25</b>                           | 182             | 31 (17.0)                       | 1.39          | (0.96 - 2.02) | 0.08    | 1.13        | (0.76 - 1.67) | 0.54    |
|                        | <b>eGFR &lt;45 and BUN <math>\geq</math>25</b>              | 991             | 303 (30.6)                      | 2.83          | (2.41 - 3.31) | <0.001  | 1.75        | (1.46 - 2.08) | <0.001  |
| <b>Cardiac death</b>   | <b>eGFR <math>\geq</math>45 and BUN &lt;25</b>              | 2368            | 158 (6.7)                       | 1.00          |               |         | 1.00        |               |         |
|                        | <b>eGFR <math>\geq</math>45 and BUN <math>\geq</math>25</b> | 908             | 117 (12.9)                      | 2.11          | (1.66 - 2.68) | <0.001  | 1.50        | (1.17 - 1.92) | 0.002   |
|                        | <b>eGFR &lt;45 and BUN &lt;25</b>                           | 182             | 14 (7.7)                        | 1.21          | (0.70 - 2.09) | 0.50    | 0.99        | (0.55 - 1.78) | 0.97    |
|                        | <b>eGFR &lt;45 and BUN <math>\geq</math>25</b>              | 991             | 175 (17.7)                      | 3.12          | (2.52 - 3.88) | <0.001  | 2.08        | (1.64 - 2.64) | <0.001  |

eGFR = estimated glomerular filtration rate, BUN = blood urea nitrogen, HR = hazard ratio, CI = confidence interval.

Supplemental Table III. Unadjusted and adjusted risk of post-discharge mortality stratified by eGFR using the CKD-EPI equation and BUN at discharge

| Endpoint               | Group                                                       | No. of Patients | No. of patients with events (%) | Unadjusted HR | (95% CI)      | P value | Adjusted HR | (95% CI)      | P value |
|------------------------|-------------------------------------------------------------|-----------------|---------------------------------|---------------|---------------|---------|-------------|---------------|---------|
| <b>All-cause death</b> | <b>eGFR <math>\geq</math>45 and BUN &lt;25</b>              | 2386            | 311 (13.0)                      | 1.00          |               |         | 1.00        |               |         |
|                        | <b>eGFR <math>\geq</math>45 and BUN <math>\geq</math>25</b> | 966             | 218 (22.6)                      | 1.91          | (1.61 - 2.28) | <0.001  | 1.33        | (1.11 - 1.60) | 0.002   |
|                        | <b>eGFR &lt;45 and BUN &lt;25</b>                           | 164             | 26 (15.9)                       | 1.33          | (0.89 - 1.99) | 0.16    | 1.01        | (0.65 - 1.56) | 0.97    |
|                        | <b>eGFR &lt;45 and BUN <math>\geq</math>25</b>              | 933             | 296 (31.7)                      | 2.92          | (2.49 - 3.42) | <0.001  | 1.78        | (1.49 - 2.12) | <0.001  |
| <b>Cardiac death</b>   | <b>eGFR <math>\geq</math>45 and BUN &lt;25</b>              | 2386            | 160 (6.7)                       | 1.00          |               |         | 1.00        |               |         |
|                        | <b>eGFR <math>\geq</math>45 and BUN <math>\geq</math>25</b> | 966             | 123 (12.7)                      | 2.08          | (1.65 - 2.63) | <0.001  | 1.46        | (1.14 - 1.87) | 0.003   |
|                        | <b>eGFR &lt;45 and BUN &lt;25</b>                           | 164             | 12 (7.3)                        | 1.18          | (0.66 - 2.12) | 0.58    | 0.87        | (0.44 - 1.72) | 0.69    |
|                        | <b>eGFR &lt;45 and BUN <math>\geq</math>25</b>              | 933             | 169 (18.1)                      | 3.20          | (2.58 - 3.98) | <0.001  | 2.15        | (1.69 - 2.74) | <0.001  |

eGFR = estimated glomerular filtration rate, BUN = blood urea nitrogen, HR = hazard ratio, CI = confidence interval.

## Appendices

**Study investigators (53 hospitals):** Nippon Medical School: Naoki Sato, Kuniya Asai, Ryo Munakata, Toshiyuki Aokage, Asuka Yoshida; Tokyo Women's Medical University: Yuichiro Minami, Dai Yumino, Masayuki Mizuno, Erisa Kawada, Kentaro Yoshida, Yuri Ozaki, Tomohito Kogure, Shintaro Haruki; Saitamaken Saiseikai Kurihashi Hospital: Masayuki Mizuno; Aoyama Hospital, Tokyo Women's Medical University: Katsuya Kajimoto; Saiseikai Kumamoto Hospital: Koichi Nakao, Tadashi Sawamura, Toshiaki Nuki; Toyota Memorial Hospital: Ryoji Ishiki, Shigeki Yokota; Tokushima Prefectural Central Hospital: Hiroyuki Fujinaga, Takashi Yamamoto, Kenji Harada, Akihiro Saito, Norihito Kageyama, Takanobu Okumura; Chiba Hokusoh Hospital, Nippon Medical School: Noritake Hata, Koji Murai, Ayaka Nozaki; Shizuoka Medical Center: Hidekazu Kawanaka, Jun Tanabe; Hyogo Prefectural Amagasaki Hospital: Yukihito Sato; Oji General Hospital: Katsuhisa Ishii, Hitoshi Oiwa, Tomoaki Matsumoto, Daisuke Yoshida, Nobuo Kato; Showa University Fujigaoka Hospital: Hiroshi Suzuki, Nobuyuki Shimizu; Edogawa Hospital: Takehiko Keida, Masaki Fujita, Kentaro Nakamura, Toshiya Chinen, Kentaro Meguro, Tatsuro Kikuchi, Toshiyuki Nishikido, Marohito Nakata, Tatsuya Yamashita, Masaya Nakata; Kurashiki Central Hospital: Akitoshi Hirono, Kazuaki Mitsudo, Kazushige Kadota, Noriko Makita, Nagisa Watanabe; Hyogo College of Medicine: Masaaki Kawabata, Kenichi Fujii; Yamaguchi University: Shinichi Okuda, Shigeki Kobayashi; Fukui Cardiovascular Center: Ikuo Moriuchi, Kiyoo Mizuno, Kazuo Osato, Tatsuaki Murakami, Yoshifumi Shimada, Katsushi Misawa, Hiromasa Kokado, Takashi Fujita, Yoshitomo Fukuoka, Syu Takabatake;

Tokyo Medical University Hospital: Yoshifumi Takata, Manabu Miyagi, Nobuhiro Tanaka, Akira Yamashina; Yatsu Hoken Hospital: Shinji Sudo; Shonan Dai-ichi Hospital: Koichi Shimamura, Michitaka Nagashima; Komatsu Municipal Hospital: Tomoya Kaneda, Kosei Ueda, Hiromasa Kato, Toshinori Higashikata; Sendai Cardiovascular Center: Kanichi Fujimori, Hiroshi Kobayashi, Shinya Fujii, Masahiro Yagi, Yuri Ozaki, Jyunko Takaki; Gunma Prefectural Cardiovascular Center: Eiji Yamashita, Takuji Toyama; Seirei Hamamatsu General Hospital: Tetsuo Hirata, Kazuho Kamisihima, Toshiaki Oka; Osaka City General Hospital: Ryushi Komatsu, Akira Itoh, Takahiko Naruko, Yukio Abe, Eiichirou Nakagawa, Atsuko Furukawa, Naoto Kinou, Shoko Uematsu, Isao Tabuchi; Suwa Central Hospital: Taku Imai; Kyushu University Hospital: Takafumi Sakamoto, Koji Todaka; Nagasaki University Hospital of Medicine and Dentistry: Yuji Koide, Koji Maemura; Tokai University School of Medicine: Koichiro Yoshioka; Fukushima Medical University: Akiomi Yoshihisa, Takamasa Sato, Yasuchika Takeishi; Yokohama City University Medical Center: Toshiaki Ebina, Kazuo Kimura, Masaaki Konishi; Tottori University Hospital: Masahiko Kato, Yoshiharu Kinugasa, Katsunori Ishida, Shinobu Sugihara, Kiyotaka Yanagihara; Asahikawa Medical College: Toshiharu Takeuchi, Motoi Okada, Naoyuki Hasebe; Showa University School of Medicine: Tetsuo Sakai, Taku Asano, Yoshino Minoura, Tsutomu Toshida, Takatoshi Sato, Yuya Yokota, Seita Kondo; Osaka University Hospital: Yasushi Sakata, Issei Komuro, Kinya Otsu, Shizuya Yamashita, Yoshihiro Asano; Kitamura Hospital: Asuka Yoshida; Sensoji Hospital: Katsuya Kajimoto; Osaka Police Hospital: Kazunori Kashiwase, Yasunori Ueda; Komaki City Hospital: Taizo Kondo, Katsuhiro Kawaguchi, Akinori

Sawamura; Fukuoka Wajiro Hospital: Taro Saito, Toru Higa, Hiroo Noguchi, Yoko Yanagita, Keita

Nakamura, Tomo Komaki; Saitama Medical University International Medical Center: Toshihiro

Muramatsu, Tomomi Koizumi, Yoshie Nakajima, Toshihiko Kikutani, Yoshifumi Ikeda, Toru Tamaki,

Shuhei Funada, Harumi Ogawa; Saiseikai Nagasaki Hospital: Koichiro Sakuragawa; Keio University

School of Medicine: Shun Kohsaka; Saiseikai Futsukaichi Hospital: Shin-ichi Ando, Toshiaki

Kadokami, Eiko Ishida, Katsumi Ide; Sakurabashi Watanabe Hospital: Yohei Sotomi, Yoshiharu

Higuchi, Motoko Uehara; Nagoya City University Graduate School of Medical Sciences: Toshihiko

Goto, Nobuyuki Ohte; Tohoku University Hospital: Masanobu Miura, Nobuyuki Shiba, Kotaro

Nochioka, Hiroaki Shimokawa; Nippon Steel Yawata Memorial Hospital: Shiro Ishihara, Tokushi

Koga, Shinichiro Fujishima, Shigeru Kaseda, Yoshie Haga; St. Marianna University School of

Medicine Hospital: Keisuke Kida; Tokyo Women's Medical University Yachiyo Medical Center:

Kazuho Kamisihima; Okinawa Prefectural Nannbu Medical Center & Children's Medical Center:

Makiko Nakamura, Osahiko Sunagawa, Takafumi Miyara, Youji Taba, Takashi Touma, Osamu Shinjo;

Jichi Medical University: Yoshioki Nishimura, Kazuomi Kario, Hayato Shimizu; Nippon Medical

School Musashi Kosugi Hospital: Takahiro Uchida, Ken-ichi Amitani, Naoki Sato.

**Statistical data center:** Katsunori Shimada (STATZ Institute, Inc., Tokyo, Japan).
